# Supplementary material for: A dual-response regenerable luminescent 2D-MOF for nitroaromatic sensing via target-modulation of active interaction sites
Source: Royal Society of Chemistry journal article supplement (doi:10.1039/d1tc02190g), 2021-01-01
Supplement: d1tc02190g1.pdf [file d1tc02190g1.pdf]

## Supplementary Information

### **A dual-response regenerable luminescent 2D-MOF for nitroaromatic sensing via target-modulation of active interaction sites**

**Farzaneh Afshariazar, Ali Morsali\***

Department of Chemistry, Faculty of Sciences, Tarbiat Modares University, P.O. Box 14115-175, Tehran, Iran

E-mail: Morsali\_a@modares.ac.ir

#### **Experimental section.**

##### **Materials and characterization techniques.**

All chemical materials were commercially available and used as received. Infrared spectra were recorded using a Thermo Scientific Nicolet IR 100 FT-IR spectrometer. X-ray powder diffraction (XRD) measurements were done on a Philips X'pert diffractometer with monochromated Cu-K $\alpha$  radiation. Thermal curves were obtained on a PL-STA 1500 apparatus with the heating rate of 10°C /min up to 800 °C under a constant flow of nitrogen. SEM analysis was performed by TESCAN MIRA instrument. Sonochemical synthesis was carried out in a SONICA-2200 EP ultrasonic bath (frequency of 20 kHz). The luminescent properties were investigated by a fluorescence spectrometer (PerkinElmer LS45) with a slit width of 10 nm at ambient conditions.

**Table S1.**  
Structural data and refinement parameters for **TMU-58**.<sup>1</sup>

---

|                                                           |                                                                  |
|-----------------------------------------------------------|------------------------------------------------------------------|
| <i>Crystal data</i>                                       |                                                                  |
| Chemical formula                                          | C <sub>31</sub> H <sub>27</sub> N <sub>7</sub> O <sub>6</sub> Zn |
| $M_r$                                                     | 658.97                                                           |
| Crystal system                                            | Monoclinic                                                       |
| Space group                                               | $P2_1/c$                                                         |
| Temperature [K]                                           | 298(2)                                                           |
| $a$ [Å]                                                   | 9.248(2)                                                         |
| $b$ [Å]                                                   | 26.079(6)                                                        |
| $c$ [Å]                                                   | 12.051(3)                                                        |
| $\alpha$ [°]                                              | 90.0                                                             |
| $\beta$ [°]                                               | 96.937(6)                                                        |
| $\gamma$ [°]                                              | 90.0                                                             |
| $V$ [Å <sup>3</sup> ]                                     | 2885.3(12)                                                       |
| $Z$                                                       | 4                                                                |
| $\mu$ [mm <sup>-1</sup> ]                                 | 0.910                                                            |
| <i>Data collection</i>                                    |                                                                  |
| $T_{min}, T_{max}$                                        | 0.8044, 0.8533                                                   |
| No. of measured reflections                               | 23321                                                            |
| No. of independent reflections                            | 5646                                                             |
| No. of observed reflections<br>[ $I > 2\sigma(I)$ ]       | 4141                                                             |
| $R_{int}$                                                 | 0.0696                                                           |
| $\theta$ range for cell measurement                       | 2.31 to 24.08°                                                   |
| <i>Refinement</i>                                         |                                                                  |
| $R[F^2 > 2\sigma(F^2)]$                                   | 0.0497                                                           |
| $wR(F^2)$                                                 | 0.1072                                                           |
| $S$                                                       | 1.043                                                            |
| No. of reflections                                        | 5646                                                             |
| No. of parameters                                         | 409                                                              |
| No. of restraints                                         | 0                                                                |
| $\Delta\rho_{max}, \Delta\rho_{min}$ (e Å <sup>-3</sup> ) | 0.001, 0.000                                                     |
| CCDC Number                                               | 1901306                                                          |

---

**Table S2.** Selected bond distances [ $\text{\AA}$ ], and angles [ $^\circ$ ] of **TMU-58**.<sup>1</sup>

|           |          |
|-----------|----------|
| Zn1 O1    | 2.001(2) |
| Zn1 N1    | 2.065(3) |
| Zn1 O4    | 2.172(3) |
| Zn1 O5    | 2.118(3) |
| Zn1 N6    | 2.085(3) |
| O1 Zn1 O4 | 152.8(1) |
| O1 Zn1 N1 | 100.2(1) |
| O1 Zn1 O5 | 105.1(1) |
| O4 Zn1 O5 | 60.9(1)  |
| O4 Zn1 N6 | 91.0(1)  |
| N1 Zn1 O1 | 109.1(3) |

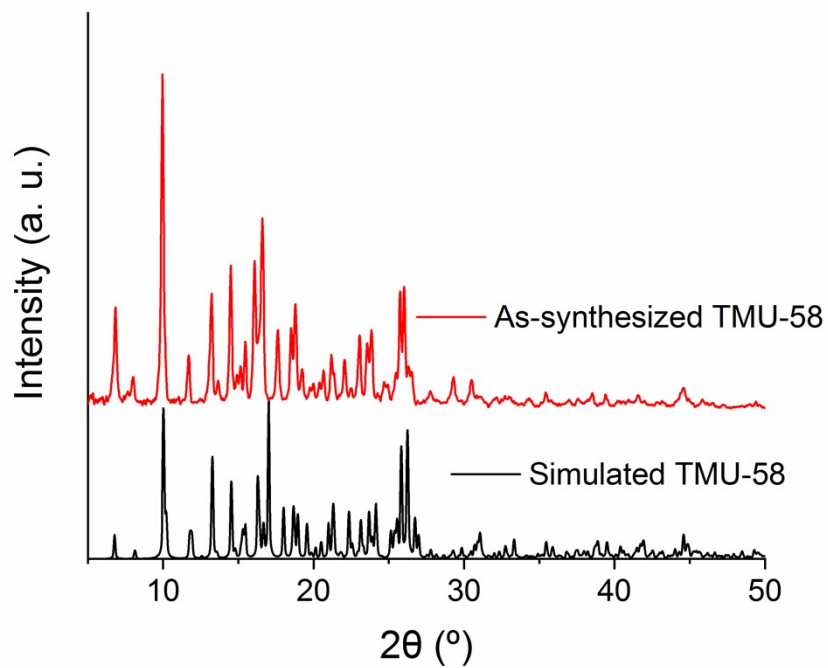

**Figure S1-** PXRD pattern of **TMU-58**.

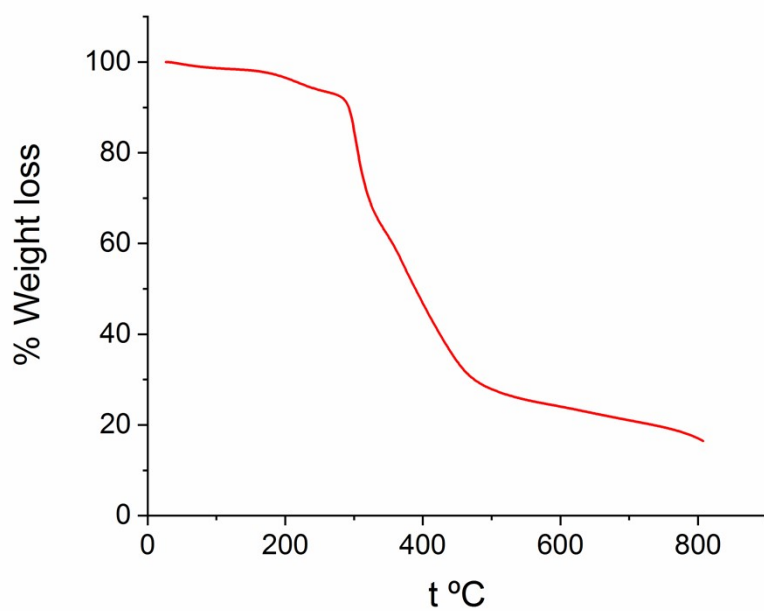

**Figure S2.** Thermogravimetric analysis of **TMU-58**.

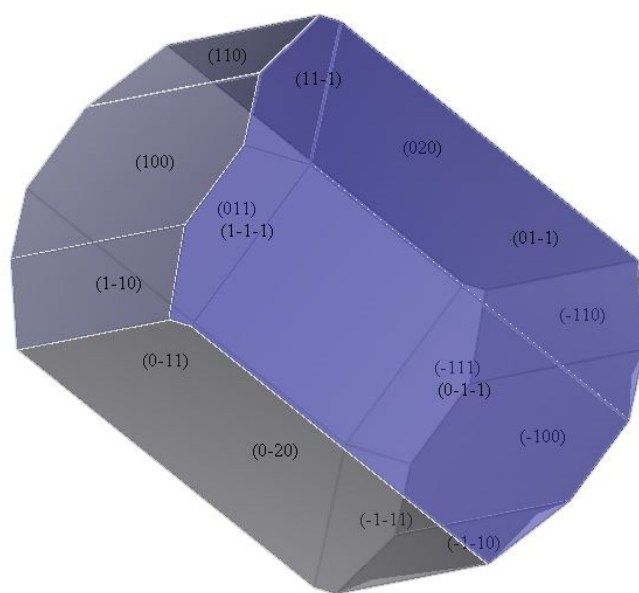

**Figure S3.** Predicted morphology of **TMU-58** from BFDH analysis.

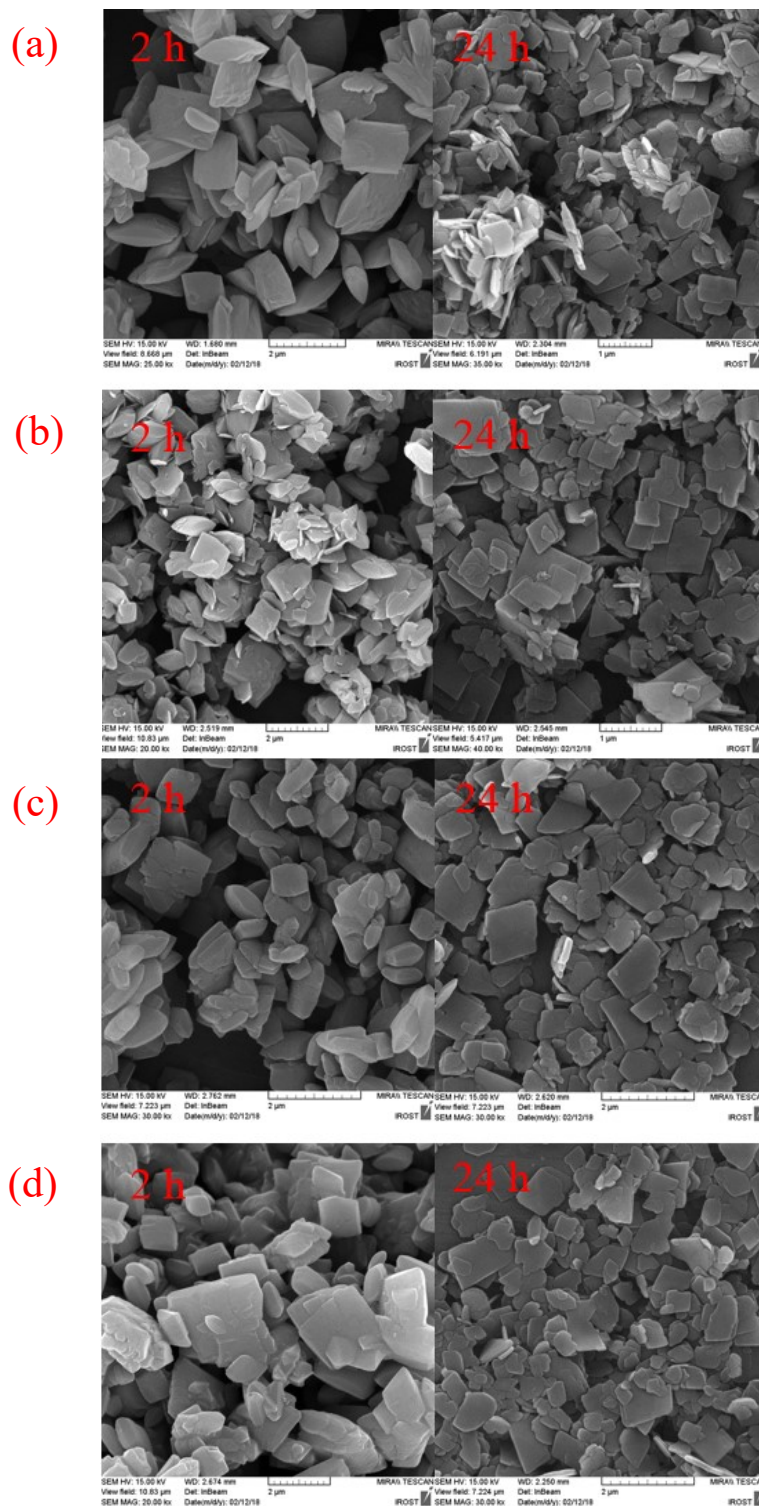

**Figure S4.** SEM images of TMU-58 obtained by various concentration of acetic acid to H<sub>2</sub>oba ligand (r value) as capping agent. (a)  $r = 2$ , (b)  $r = 5$ , (c)  $r = 10$ , (d)  $r = 15$ .

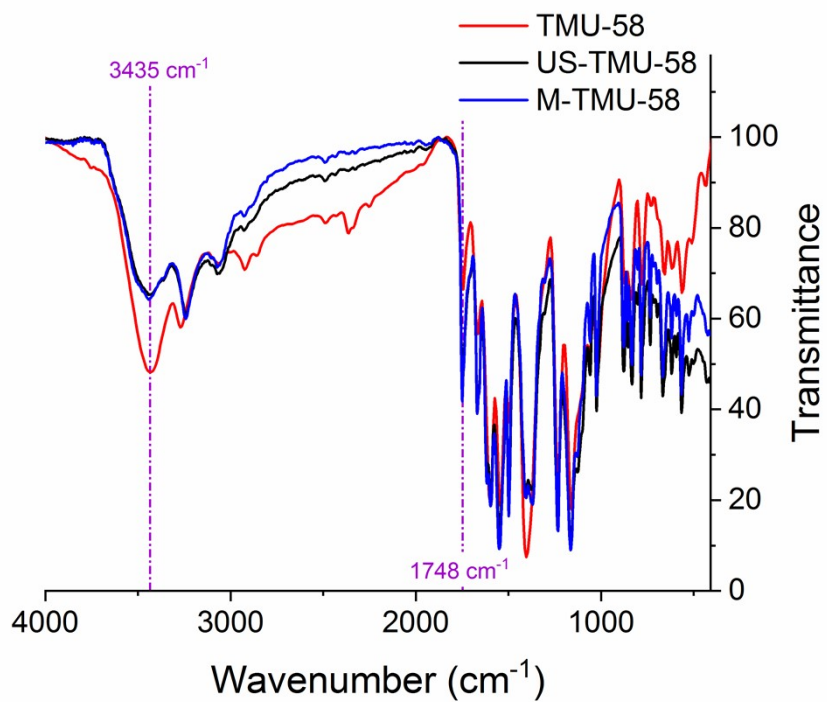

Figure S5. IR spectrum of TMU-58, US-TMU-58, and M-TMU-58.

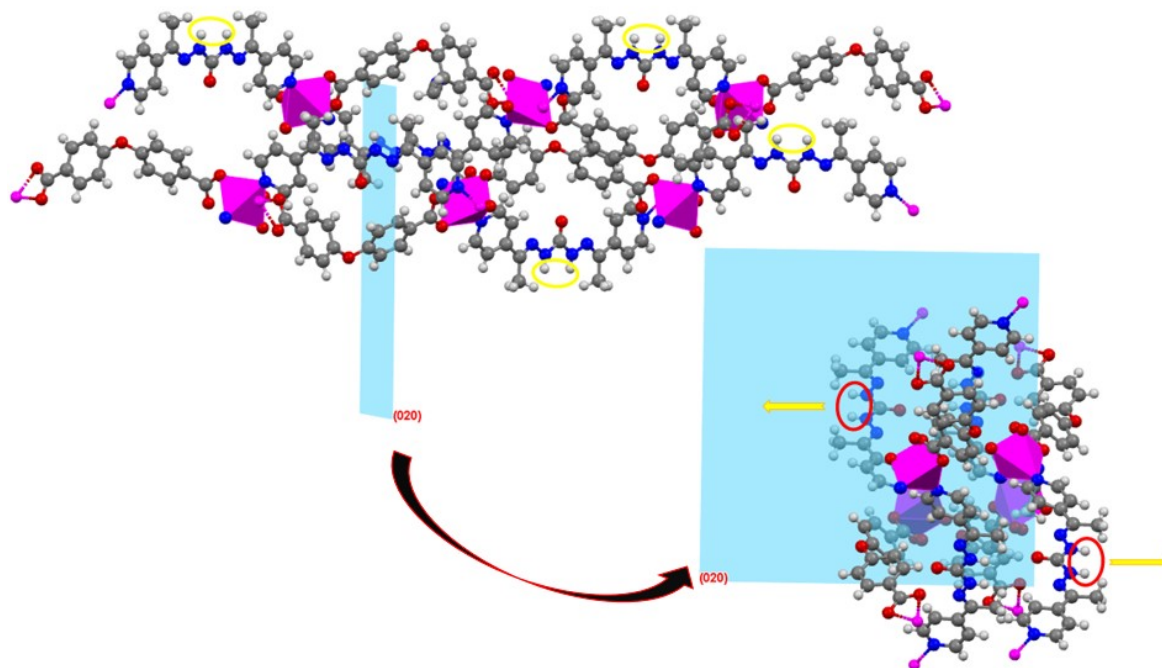

Figure S6. Representation of a 2D-layer of TMU-58 along the (020) reflection plane.

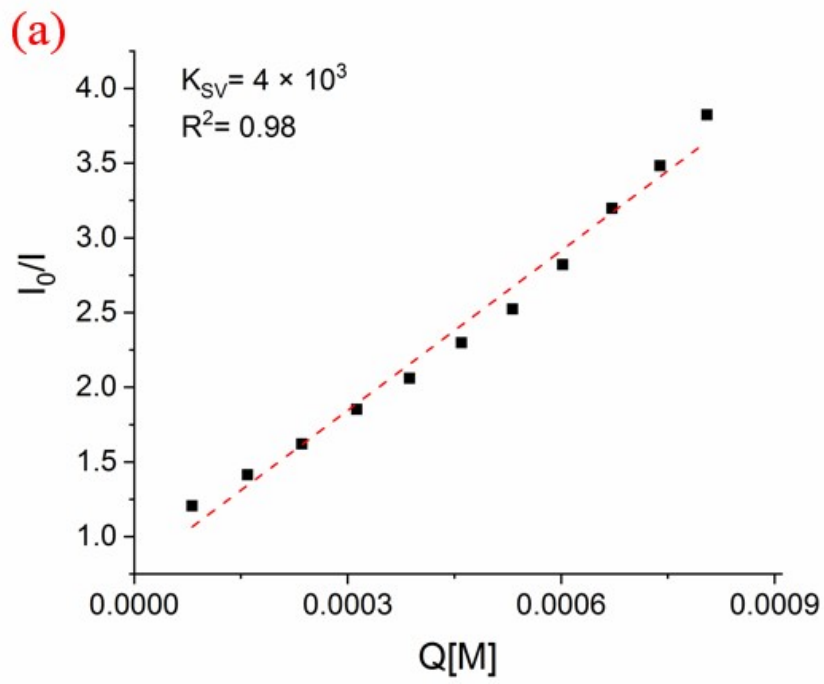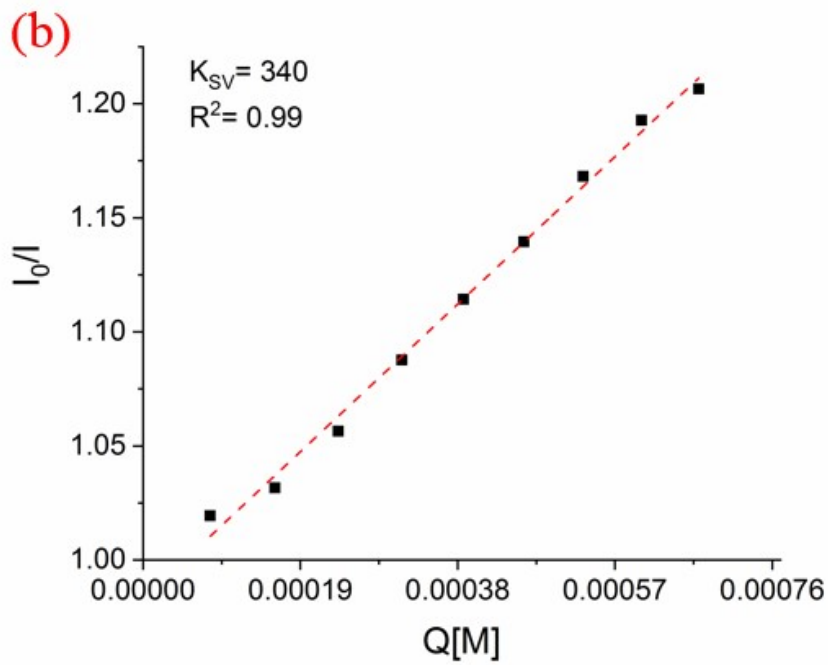



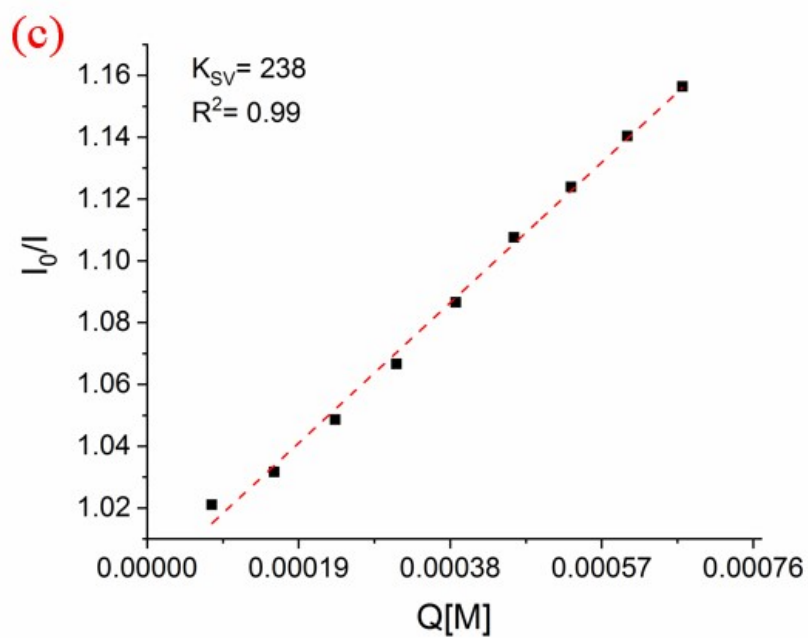

**Figure S7.** Stern-Volmer plots of a) TMU-58, b) US-TMU-58, c) M-TMU-58 for NB analyte.

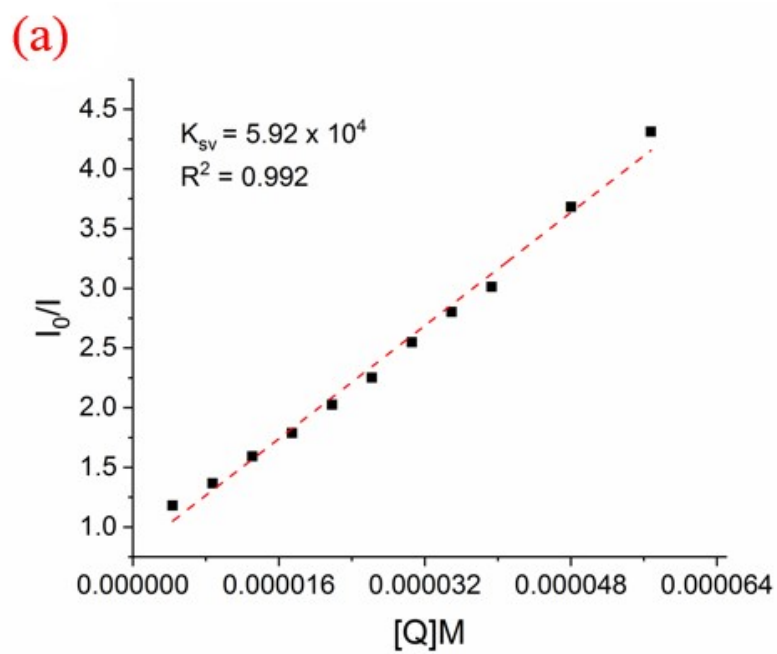

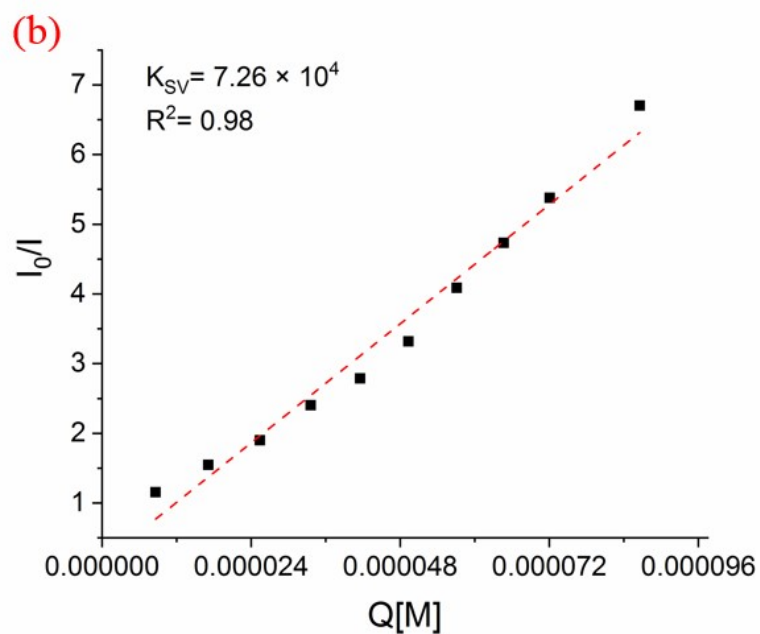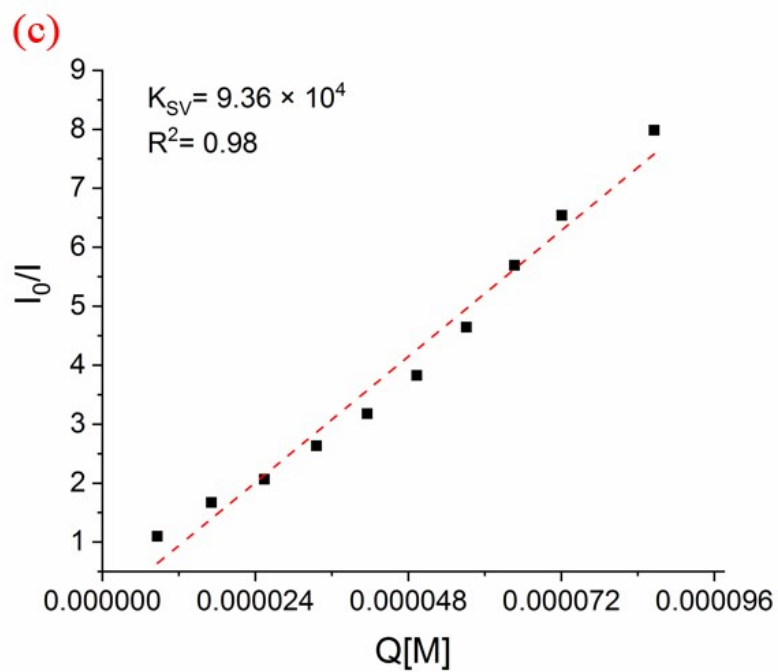

**Figure S8.** Stern-Volmer plots of a) TMU-58, b) US-TMU-58, c) M-TMU-58 for TNP analyte.

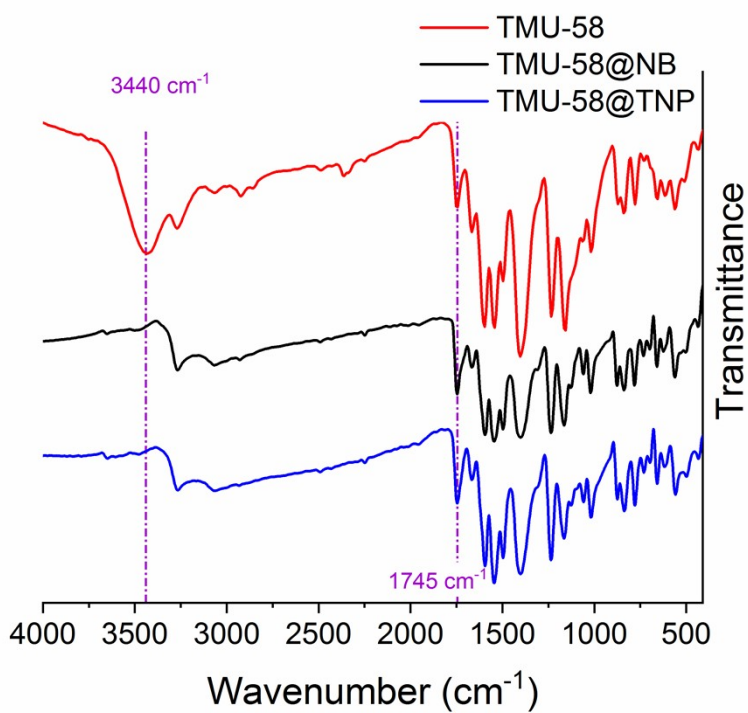

**Figure S9.** IR spectrums of **TMU-58** before and after sensing of **NB** and **TNP** analytes.

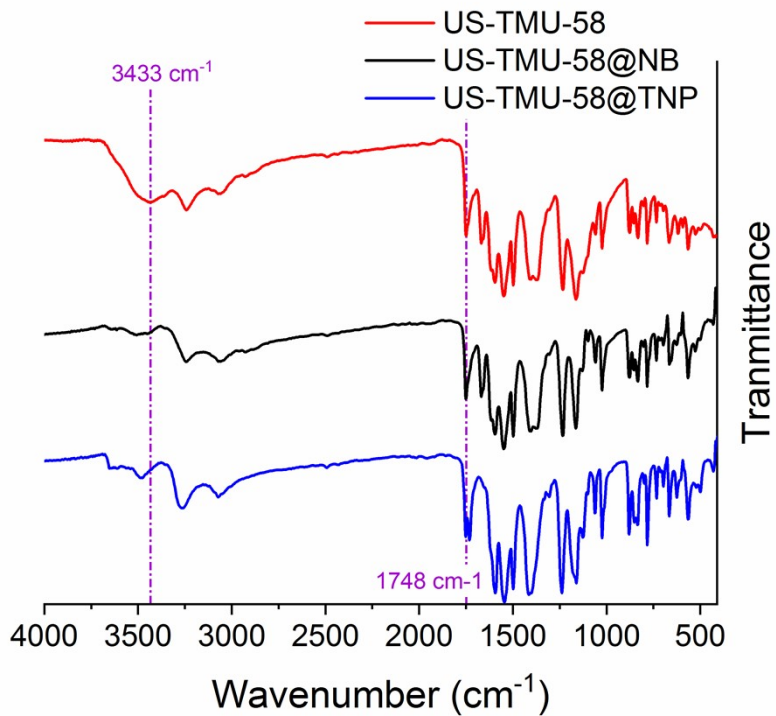

**Figure S10.** IR spectrums of **US-TMU-58** before and after sensing of **NB** and **TNP** analytes.

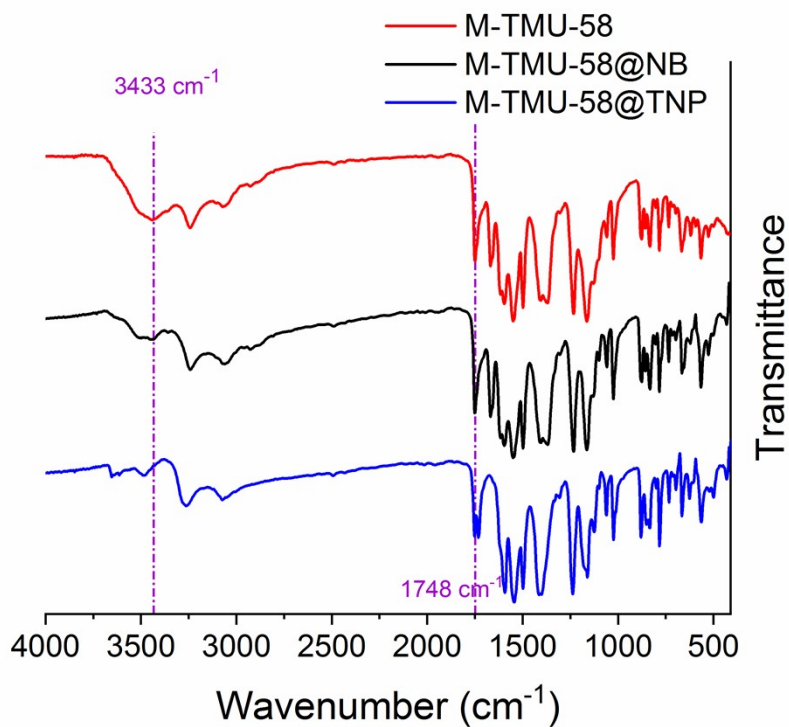

**Figure S11.** IR spectrums of **M-TMU-58** before and after sensing of **NB** and **TNP** analytes.

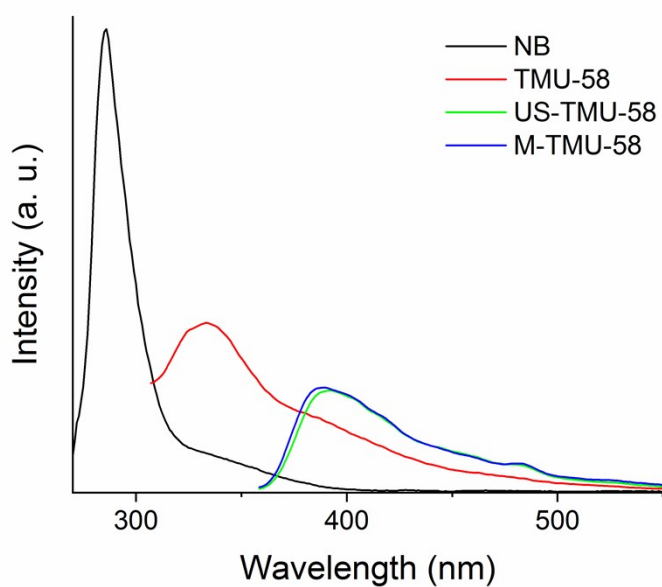

**Figure S12.** Spectral overlap between the absorption spectra of **NB** analyte and the emission spectrum of **TMU-58**, **US-TMU-58**, and **M-TMU-58**, respectively.

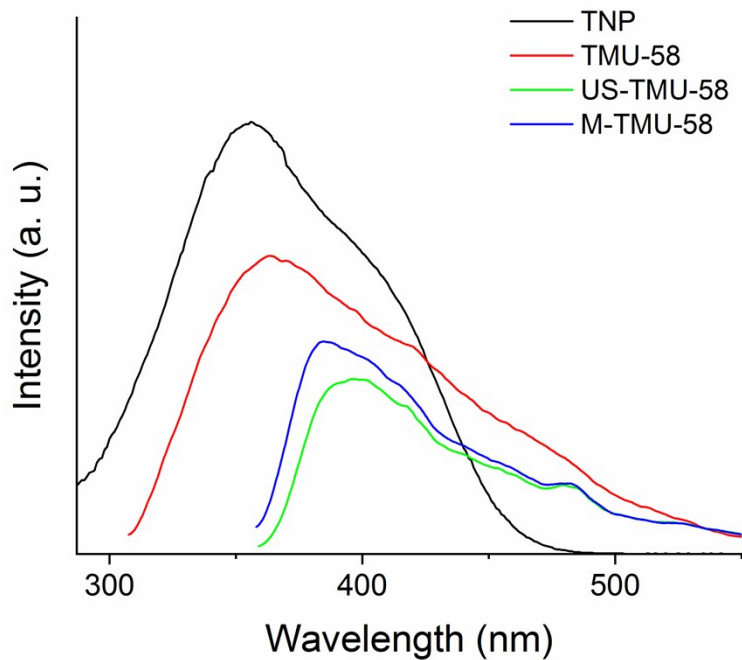

**Figure S13.** Spectral overlap between the absorption spectra of **TNP** analyte and the emission spectrum of **TMU-58**, **US-TMU-58**, and **M-TMU-58**, respectively.

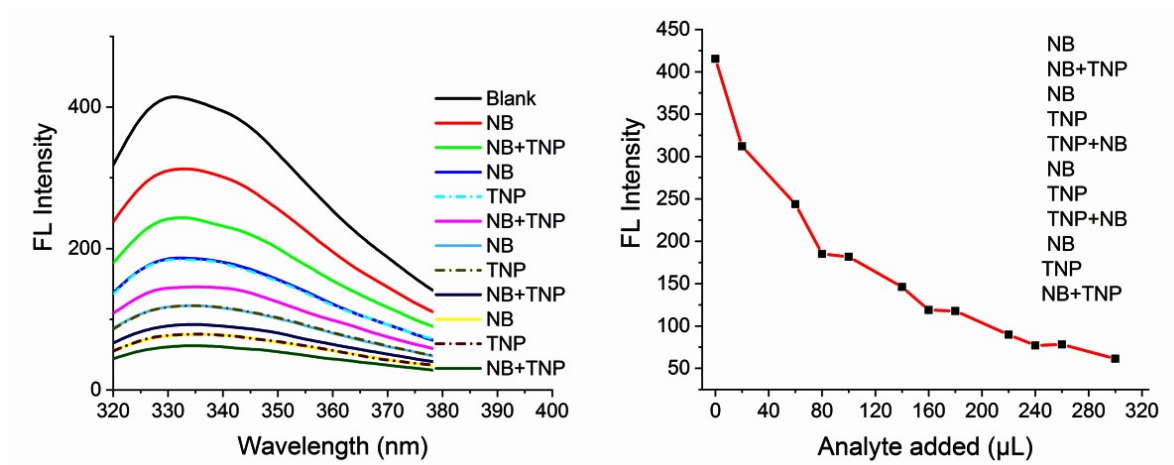

**Figure S14.** Representation of the response selectivity of **TMU-58** towards **NB** analyte in the presence of **TNP**.

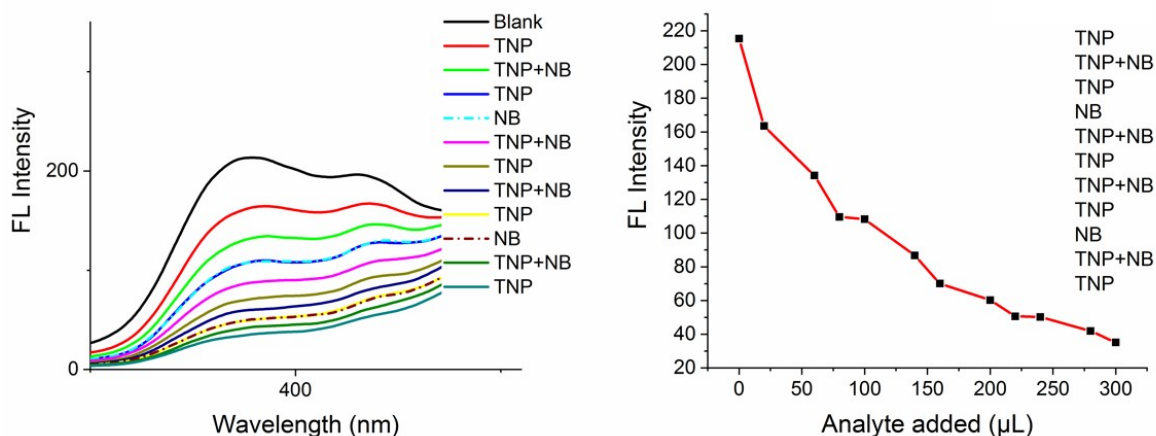

**Figure S15.** Representation of the response selectivity of **US-TMU-58** towards **TNP** analyte in the presence of **NB**.

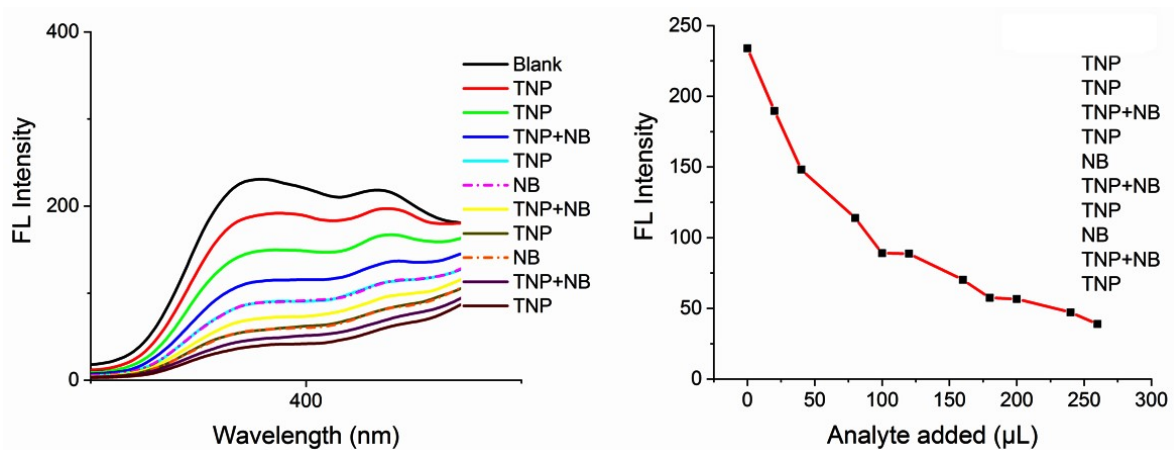

**Figure S16.** Representation of the response selectivity of **M-TMU-58** towards **TNP** analyte in the presence of **NB**.

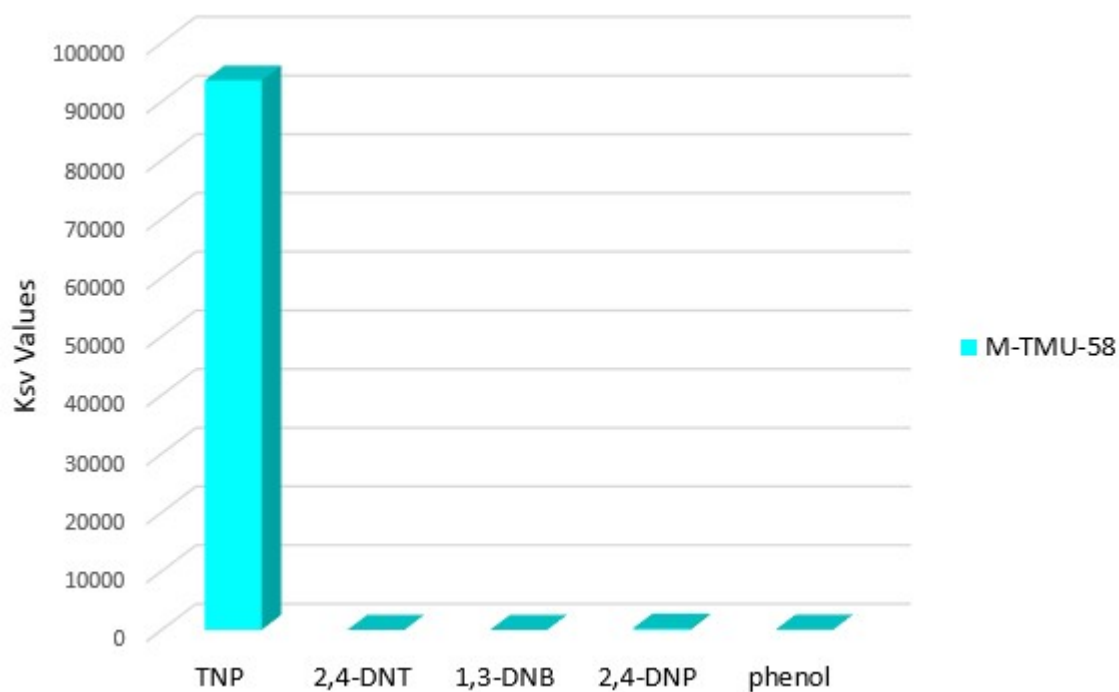

**Figure S17.** The response selectivity of **M-TMU-58** towards various analytes.

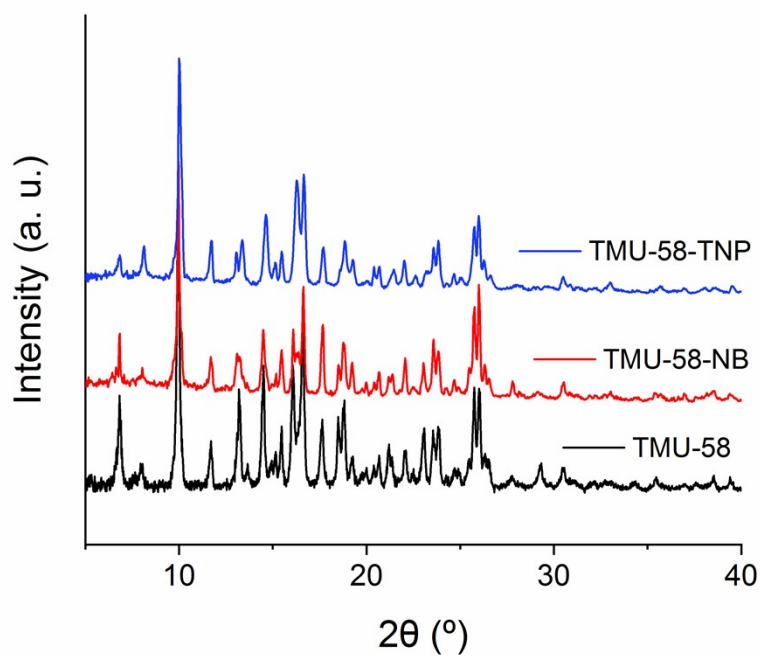

**Figure S18.** Chemical stability of **TMU-58** after **NB** and **TNP** sensing.

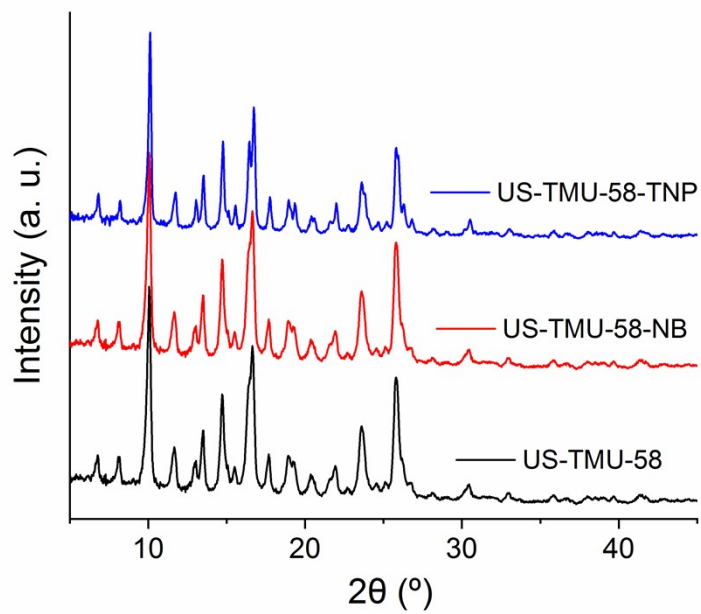

**Figure S19.** Chemical stability of **US-TMU-58** after **NB** and **TNP** sensing.

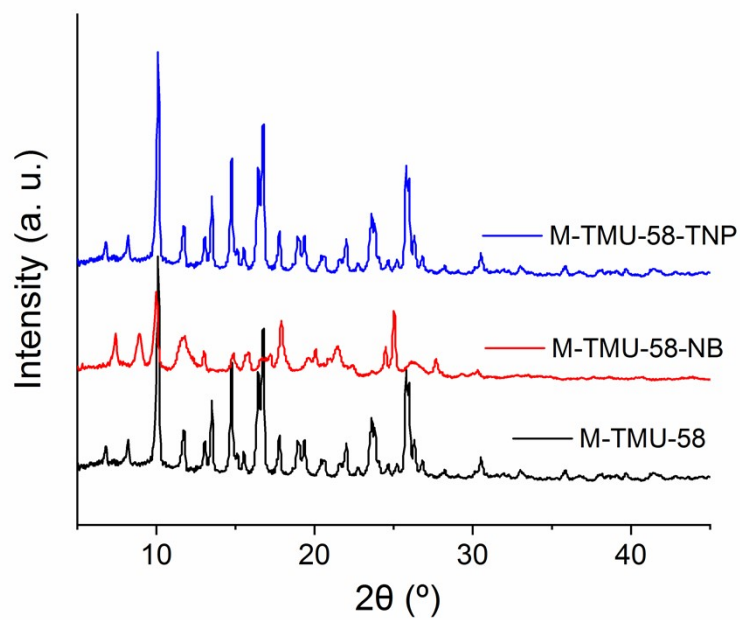

**Figure S20.** Chemical stability of **M-TMU-58** after **NB** and **TNP** sensing.



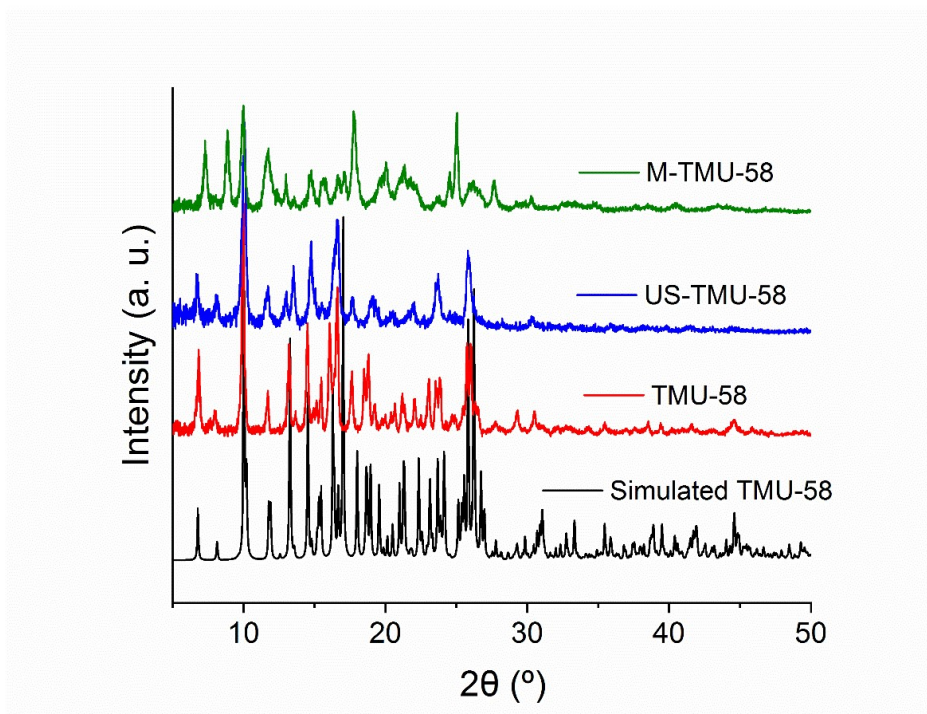

**Figure S21.** PXRD patterns of recovered **TMU-58**, **US-TMU-58**, and **M-TMU-58** after 3 cycles of sensing.

## Reference

1. F. Afshariazar and A. Morsali, Target-Architecture Engineering of a Novel Two-dimensional Metal-Organic Framework for High Catalytic Performance, *Cryst. Growth Des.*, 2019, **19**, 4239–4245.
